# Supplementary material for: TRPV1 deletion in male mice alters cardiomyocyte ultrastructure without affecting baseline cardiac function
Source: Sci Rep. 2025 Dec 21;15:45781. doi: 10.1038/s41598-025-28521-5 (PMC12756331; doi:10.1038/s41598-025-28521-5)
Supplement: Supplementary file 1 — Supplementary Material 1 [file 41598_2025_28521_MOESM1_ESM.xlsx]

## Sheet: Sheet1
Paper	DOI	Total Citations	TC per Year	Normalized TC
YANG DC, 2010, CELL METAB	10.1016/j.cmet.2010.05.015	281	17.56	5.25
GAO W, 2018, NAT COMMUN	10.1038/s41467-017-02657-z	267	33.38	9.83
KAWABATA A, 2011, BIOL PHARM BULL	10.1248/bpb.34.1170	250	16.67	3.93
CHEN J, 2011, PAIN	10.1016/j.pain.2011.01.049	217	14.47	3.41
WANG LH, 2005, CIRCULATION	10.1161/CIRCULATIONAHA.105.556274	205	9.76	2.11
MOLLIVER DC, 2005, MOL PAIN	10.1186/1744-8069-1-35	186	8.86	1.92
NOH KM, 2012, P NATL ACAD SCI USA	10.1073/pnas.1121568109	157	11.21	3.43
CHENG W, 2007, J GEN PHYSIOL	10.1085/jgp.200709731	155	8.16	3.07
DENG F, 2021, GUT MICROBES	10.1080/19490976.2021.1902719	154	30.8	9.85
LUO ZD, 2012, CELL RES	10.1038/cr.2011.205	151	10.79	3.3
PETERS JH, 2010, NEURON	10.1016/j.neuron.2010.02.017	150	9.38	2.8
POZSGAI G, 2010, CARDIOVASC RES	10.1093/cvr/cvq118	113	7.06	2.11
PACHER P, 2004, J PHYSIOL-LONDON	10.1113/jphysiol.2004.064824	102	4.64	1.72
ZHONG B, 2007, AM J PHYSIOL-HEART C	10.1152/ajpheart.00169.2007	100	5.26	1.98
RUBAIY HN, 2017, J BIOL CHEM	10.1074/jbc.M116.773556	91	10.11	4.57
ATHANASIOU A, 2007, BIOCHEM BIOPH RES CO	10.1016/j.bbrc.2006.12.179	91	4.79	1.8
GHELFI E, 2008, TOXICOL SCI	10.1093/toxsci/kfn005	90	5	2.46
AGOPYAN N, 2004, AM J PHYSIOL-LUNG C	10.1152/ajplung.00299.2003	84	3.82	1.42
MARSHALL NJ, 2013, HYPERTENSION	10.1161/HYPERTENSIONAHA.112.201434	81	6.23	1.92
ALPTEKIN M, 2015, TUMOR BIOL	10.1007/s13277-015-3577-x	80	7.27	2.68
PARK J, 2020, NAT NANOTECHNOL	10.1038/s41565-020-0701-x	79	13.17	4.41
SMITH SA, 2005, CIRCULATION	10.1161/01.CIR.0000162473.10951.0A	79	3.76	0.81
ANTUNES-CORREA LM, 2014, AM J PHYSIOL-HEART C	10.1152/ajpheart.00136.2014	76	6.33	2.1
SUN J, 2013, CARDIOVASC DIABETOL	10.1186/1475-2840-12-69	75	5.77	1.78
LI Q, 2013, PFLUG ARCH EUR J PHY	10.1007/s00424-013-1274-4	73	5.62	1.73
TSUCHIMOCHI H, 2010, AM J PHYSIOL-HEART C	10.1152/ajpheart.00141.2010	73	4.56	1.36
LANG HM, 2015, BRIT J PHARMACOL	10.1111/bph.12987	69	6.27	2.31
HUANG W, 2009, HYPERTENSION	10.1161/HYPERTENSIONAHA.108.118349	68	4	1.45
GAO F, 2014, PPAR RES	10.1155/2014/491963	66	5.5	1.82
SUN ZW, 2014, INT J MOL SCI	10.3390/ijms151018362	65	5.42	1.79
CAO ZJ, 2014, AM J PHYSIOL-REG I	10.1152/ajpregu.00329.2013	65	5.42	1.79
XIONG SQ, 2016, HYPERTENSION	10.1161/HYPERTENSIONAHA.115.06223	64	6.4	2.6
ZHANG YM, 2012, J MOL CELL BIOL	10.1093/jmcb/mjs002	64	4.57	1.4
ROBERTSON S, 2014, PART FIBRE TOXICOL	10.1186/1743-8977-11-12	63	5.25	1.74
ZHONG BH, 2008, AM J PHYSIOL-HEART C	10.1152/ajpheart.00022.2008	63	3.5	1.72
SEXTON A, 2007, FASEB J	10.1096/fj.06-7828com	63	3.32	1.25
LI L, 2012, PFLUG ARCH EUR J PHY	10.1007/s00424-012-1078-y	61	4.36	1.33
YOSHIE K, 2020, JCI INSIGHT	10.1172/jci.insight.124477	60	10	3.35
SUN H, 2009, J PHARMACOL EXP THER	10.1124/jpet.109.160473	58	3.41	1.24
ANDREI SR, 2016, CHANNELS	10.1080/19336950.2016.1185579	57	5.7	2.32
FACER P, 2011, INT HEART J	10.1536/ihj.52.146	56	3.73	0.88
HUTSON MR, 2017, SCI SIGNAL	10.1126/scisignal.aal4055	55	6.11	2.76
MIZUNO M, 2011, J PHYSIOL-LONDON	10.1113/jphysiol.2011.214429	55	3.67	0.86
SMITH SA, 2010, J PHYSIOL-LONDON	10.1113/jphysiol.2009.184952	54	3.38	1.01
STARR A, 2008, CARDIOVASC RES	10.1093/cvr/cvn012	54	3	1.48
ZHAO ZH, 2018, STEM CELLS INT	10.1155/2018/6067096	52	6.5	1.91
SUN SK, 2012, BRAIN RES BULL	10.1016/j.brainresbull.2012.06.002	49	3.5	1.07
BUCKLEY CL, 2011, CHANNELS	10.4161/chan.5.4.17083	49	3.27	0.77
WEI ZH, 2009, CIRC J	10.1253/circj.CJ-08-0945	49	2.88	1.05
REN JY, 2011, REGUL PEPTIDES	10.1016/j.regpep.2011.04.004	48	3.2	0.75
PHAN TX, 2020, J PHYSIOL-LONDON	10.1113/JP279909	47	7.83	2.62
HOFMANN NA, 2014, BIOL OPEN	10.1242/bio.20149571	47	3.92	1.3
WANG Q, 2014, AM J HYPERTENS	10.1093/ajh/hpu068	47	3.92	1.3
GUARINI G, 2012, AM J PHYSIOL-HEART C	10.1152/ajpheart.00011.2012	47	3.36	1.03
WASHBURN DG, 2013, BIOORG MED CHEM LETT	10.1016/j.bmcl.2013.06.047	46	3.54	1.09
ZHONG BH, 2009, AM J PHYSIOL-REG I	10.1152/ajpregu.90746.2008	44	2.59	0.94
HURT CM, 2016, J AM HEART ASSOC	10.1161/JAHA.116.003774	42	4.2	1.71
LU MJ, 2014, BASIC RES CARDIOL	10.1007/s00395-014-0414-0	42	3.5	1.16
SEEBACHER F, 2007, PLOS ONE	10.1371/journal.pone.0000281	42	2.21	0.83
GAZZIERI D, 2006, CARDIOVASC RES	10.1016/j.cardiores.2006.02.027	41	2.05	1.85
GU QH, 2005, AM J PHYSIOL-LUNG C	10.1152/ajplung.00439.2004	40	1.9	0.41
CONKLIN DJ, 2017, TOXICOL APPL PHARM	10.1016/j.taap.2016.08.028	39	4.33	1.96
GE W, 2016, BBA-MOL BASIS DIS	10.1016/j.bbadis.2015.12.014	39	3.9	1.59
PEI ZH, 2014, PHARMACOL RES	10.1016/j.phrs.2014.03.010	39	3.25	1.08
GAO YF, 2015, BIOCHEM BIOPH RES CO	10.1016/j.bbrc.2015.06.054	38	3.45	1.27
DITTING T, 2012, HYPERTENSION	10.1161/HYPERTENSIONAHA.111.185538	38	2.71	0.83
STRECKER T, 2005, CARDIOVASC RES	10.1016/j.cardiores.2004.10.013	37	1.76	0.38
FOSGERAU K, 2010, BMC CARDIOVASC DISOR	10.1186/1471-2261-10-51	36	2.25	0.67
MA JJ, 2019, EUR J MED CHEM	10.1016/j.ejmech.2019.02.037	35	5	2.81
XING JH, 2008, AM J PHYSIOL-HEART C	10.1152/ajpheart.00271.2008	35	1.94	0.96
BENCSIK P, 2008, BRIT J PHARMACOL	10.1038/sj.bjp.0707599	35	1.94	0.96
MOVAHED P, 2005, BRIT J PHARMACOL	10.1038/sj.bjp.0706313	35	1.67	0.36
MICHLIG S, 2016, SCI REP-UK	10.1038/srep20795	34	3.4	1.38
TERZIAN ALB, 2014, PSYCHOPHARMACOLOGY	10.1007/s00213-013-3211-9	34	2.83	0.94
LU SH, 2013, BIOCHEM BIOPH RES CO	10.1016/j.bbrc.2013.10.128	34	2.62	0.81
HORTON JS, 2013, CHANNELS	10.4161/chan.23006	34	2.62	0.81
MATSUURA K, 2016, SCI REP-UK	10.1038/srep21747	33	3.3	1.34
MA LL, 2014, ARTERIOSCL THROM VAS	10.1161/ATVBAHA.113.303346	33	2.75	0.91
ZHANG L, 2012, J APPL PHYSIOL	10.1152/japplphysiol.01228.2011	33	2.36	0.72
WANG HJ, 2012, AM J PHYSIOL-REG I	10.1152/ajpregu.00054.2012	33	2.36	0.72
VIANNA LC, 2018, J APPL PHYSIOL	10.1152/japplphysiol.00038.2018	32	4	1.18
HUANG JY, 2018, EUR J PHARMACOL	10.1016/j.ejphar.2017.11.028	32	4	1.18
KOSSAKOWSKI R, 2019, FRONT PHARMACOL	10.3389/fphar.2019.00500	31	4.43	2.49
ULIANA DL, 2016, NEUROPHARMACOLOGY	10.1016/j.neuropharm.2015.12.020	31	3.1	1.26
YU Q, 2012, MOL BIOL REP	10.1007/s11033-012-1592-1	31	2.21	0.68
DUTTA A, 2010, ACTA PHYSIOL	10.1111/j.1748-1716.2010.02105.x	31	1.94	0.58
GARCÍA MD, 2009, EUR J PHARMACOL	10.1016/j.ejphar.2009.03.021	31	1.82	0.66
XING JH, 2009, AM J PHYSIOL-HEART C	10.1152/ajpheart.00063.2009	31	1.82	0.66
LUO DL, 2022, HYPERTENSION	10.1161/HYPERTENSIONAHA.121.18778	30	7.5	2.98
ROY A, 2018, J PHYSIOL-LONDON	10.1113/JP275001	30	3.75	1.1
SAKAMOTO K, 2014, EUR J PHARMACOL	10.1016/j.ejphar.2014.03.035	30	2.5	0.83
WANG YP, 2013, CLIN VACCINE IMMUNOL	10.1128/CVI.00674-12	29	2.23	0.69
ZHU SL, 2022, PHYTOMEDICINE	10.1016/j.phymed.2022.154081	28	7	2.78
HAN F, 2016, CELL BIOSCI	10.1186/s13578-016-0085-7	28	2.8	1.14
ZHENG LR, 2015, J DIABETES COMPLICAT	10.1016/j.jdiacomp.2015.01.006	28	2.55	0.94
LI JZ, 2010, CAN J PHYSIOL PHARM	10.1139/Y10-067	28	1.75	0.52
GAO ZH, 2007, J APPL PHYSIOL	10.1152/japplphysiol.00161.2007	28	1.47	0.55
WALTER S, 2004, AM J MED GENET A	10.1002/ajmg.a.30160	28	1.27	0.47
ZHONG BH, 2018, BIOMED PHARMACOTHER	10.1016/j.biopha.2018.01.065	27	3.38	0.99
DÜZEN IV, 2017, SCI REP-UK	10.1038/s41598-017-10039-0	27	3	1.36
HUANG W, 2010, J HYPERTENS	10.1097/HJH.0b013e328333af48	27	1.69	0.5
DRIZIN I, 2006, BIOORGAN MED CHEM	10.1016/j.bmc.2006.03.027	27	1.35	1.22
HOOPER JS, 2016, J APPL PHYSIOL	10.1152/japplphysiol.00944.2015	26	2.6	1.06
ZAKRZESKA A, 2010, BRIT J PHARMACOL	10.1111/j.1476-5381.2009.00579.x	26	1.63	0.49
GIURIATO G, 2022, NUTRIENTS	10.3390/nu14020232	25	6.25	2.48
LEE GH, 2021, INT J MOL SCI	10.3390/ijms22179407	25	5	1.6
HORTON JS, 2014, CHANNELS	10.4161/chan.26581	25	2.08	0.69
TAVARES L, 2019, CIRC-ARRHYTHMIA ELEC	10.1161/CIRCEP.118.006942	24	3.43	1.93
COMERMA-STEFFENSEN S, 2014, CURR VASC PHARMACOL	10.2174/1570161112666140423223529	24	2	0.66
DUBES V, 2017, TOXICOLOGY	10.1016/j.tox.2016.12.002	23	2.56	1.16
LUO XJ, 2011, EUR J PHARMACOL	10.1016/j.ejphar.2011.05.032	23	1.53	0.36
MCQUEEN DS, 2004, EUR J PHARMACOL	10.1016/j.ejphar.2004.03.045	23	1.05	0.39
XU SJ, 2020, J MOL CELL CARDIOL	10.1016/j.yjmcc.2019.12.003	22	3.67	1.23
MARICHAL-CANCINO BA, 2013, EUR J PHARMACOL	10.1016/j.ejphar.2013.09.039	22	1.69	0.52
STEAGALL RJ, 2012, NEUROSCIENCE	10.1016/j.neuroscience.2012.04.023	22	1.57	0.48
THILO F, 2010, BIOCHEM BIOPH RES CO	10.1016/j.bbrc.2010.09.017	22	1.38	0.41
CHEN JM, 2018, FASEB J	10.1096/fj.201701303R	21	2.63	0.77
TONG J, 2018, CELL PHYSIOL BIOCHEM	10.1159/000490822	21	2.63	0.77
HOPPS JJ, 2012, EUR J PHARMACOL	10.1016/j.ejphar.2012.03.027	21	1.5	0.46
MU ZZ, 2007, AM J PHYSIOL-REG I	10.1152/ajpregu.00094.2007	21	1.11	0.42
SATTLER K, 2021, SCI REP-UK	10.1038/s41598-021-93958-3	20	4	1.28
ISHIZAWA R, 2021, HYPERTENSION	10.1161/HYPERTENSIONAHA.120.15672	20	4	1.28
KLINE DD, 2019, J NEUROPHYSIOL	10.1152/jn.00536.2018	20	2.86	1.61
XIE HT, 2018, NEURAL REGEN RES	10.4103/1673-5374.235074	20	2.5	0.74
CHEN M, 2016, J AM HEART ASSOC	10.1161/JAHA.116.003718	20	2	0.81
AKABORI H, 2007, ANN SURG	10.1097/01.sla.0000255577.80800.e1	20	1.05	0.4
QIN C, 2006, AM J PHYSIOL-REG I	10.1152/ajpregu.00231.2006	20	1	0.9
LIU T, 2020, BIOMED RES INT	10.1155/2020/8037273	19	3.17	1.06
PHAM TH, 2020, J AGR FOOD CHEM	10.1021/acs.jafc.9b07909	19	3.17	1.06
BENCSIK P, 2019, INT J MOL SCI	10.3390/ijms20040991	19	2.71	1.53
HEYMANN HM, 2017, BRIT J PHARMACOL	10.1111/bph.14064	19	2.11	0.96
WANG S, 2016, PAIN	10.1097/j.pain.0000000000000556	19	1.9	0.77
KIM HK, 2022, HYPERTENSION	10.1161/HYPERTENSIONAHA.122.19177	18	4.5	1.79
CONTE E, 2021, J ENDOCRINOL	10.1530/JOE-20-0346	18	3.6	1.15
DOU MY, 2019, BRIT J ANAESTH	10.1016/j.bja.2019.06.024	18	2.57	1.44
WANG DG, 2019, BIOMED PHARMACOTHER	10.1016/j.biopha.2018.10.156	18	2.57	1.44
NOTAY K, 2018, J PHYSIOL-LONDON	10.1113/JP276526	18	2.25	0.66
GUO ZL, 2018, AM J PHYSIOL-REG I	10.1152/ajpregu.00405.2017	18	2.25	0.66
JIANG XX, 2018, INT J MOL MED	10.3892/ijmm.2017.3338	18	2.25	0.66
HU YL, 2017, SCI REP-UK	10.1038/srep44951	18	2	0.9
WANG Q, 2016, INT J MOL MED	10.3892/ijmm.2016.2648	18	1.8	0.73
LUPINSKI SL, 2011, PHARMACOL REP	NA	18	1.2	0.28
OHANYAN VA, 2011, AM J PHYSIOL-HEART C	10.1152/ajpheart.00082.2011	18	1.2	0.28
HOI PM, 2007, BRIT J PHARMACOL	10.1038/sj.bjp.0707470	18	0.95	0.36
PREMKUMAR LS, 2006, MOL PAIN	10.1186/1744-8069-2-26	18	0.9	0.81
WANG B, 2022, CHEM ENG J	10.1016/j.cej.2021.134450	17	4.25	1.69
HOEBART C, 2021, ACTA PHYSIOL	10.1111/apha.13659	17	3.4	1.09
GAO SY, 2019, J ORG CHEM	10.1021/acs.joc.9b01864	17	2.43	1.36
MOHAMMED M, 2018, AM J PHYSIOL-REG I	10.1152/ajpregu.00049.2018	17	2.13	0.63
LIU DW, 2015, CURR PHARM BIOTECHNO	10.2174/1389201015666141126123401	17	1.55	0.57
DE SIQUEIRA RJ, 2014, PHYTOTHER RES	10.1002/ptr.4953	17	1.42	0.47
PHAN TX, 2022, J PHYSIOL-LONDON	10.1113/JP281873	16	4	1.59
HONG J, 2020, NEUROSCI LETT	10.1016/j.neulet.2020.135320	16	2.67	0.89
TORRES-NARVÁEZ JC, 2019, INT J ENV RES PUB HE	10.3390/ijerph16193576	16	2.29	1.28
LI XC, 2018, HYPERTENSION	10.1161/HYPERTENSIONAHA.118.11035	16	2	0.59
CHU KM, 2010, NEUROPHARMACOLOGY	10.1016/j.neuropharm.2009.10.002	16	1	0.3
SINGH R, 2020, TOXICOL APPL PHARM	10.1016/j.taap.2020.115124	15	2.5	0.84
WU Y, 2020, EUR J PHARMACOL	10.1016/j.ejphar.2019.172836	15	2.5	0.84
NIEDERMIRTL F, 2018, MOL PAIN	10.1177/1744806918811699	15	1.88	0.55
SINGH A, 2017, CARDIOVASC DRUG THER	10.1007/s10557-017-6716-3	15	1.67	0.75
RIBEIRO HV, 2016, EUR J PHARMACOL	10.1016/j.ejphar.2016.02.025	15	1.5	0.61
BUBB KJ, 2013, HYPERTENSION	10.1161/HYPERTENSIONAHA.111.00942	15	1.15	0.36
TORRES-NARVÁEZ JC, 2012, EXP CLIN CARDIOL	NA	15	1.07	0.33
MALINOWSKA B, 2010, N-S ARCH PHARMACOL	10.1007/s00210-010-0497-6	15	0.94	0.28
HAZARI MS, 2008, RESP PHYSIOL NEUROBI	10.1016/j.resp.2007.09.003	15	0.83	0.41
WILLIAMS MA, 2008, J PHYSIOL-LONDON	10.1113/jphysiol.2007.140392	15	0.83	0.41
HAN S, 2022, EVID-BASED COMPL ALT	10.1155/2022/5731372	14	3.5	1.39
SHANKS J, 2019, HYPERTENSION	10.1161/HYPERTENSIONAHA.119.13285	14	2	1.12
HWANG JH, 2017, BMC COMPLEM ALTERN M	10.1186/s12906-017-2036-1	14	1.56	0.7
HIETT SC, 2014, CARDIOVASC RES	10.1093/cvr/cvu152	14	1.17	0.39
FEKETA VV, 2014, CRIT CARE MED	10.1097/CCM.0000000000000229	14	1.17	0.39
CHENG CF, 2011, CIRC J	10.1253/circj.CJ-10-0490	14	0.93	0.22
ACCORSI-MENDONCA D, 2008, BRAIN RES	10.1016/j.brainres.2008.01.011	14	0.78	0.38
WANG YX, 2022, J CARDIOVASC PHARM	10.1097/FJC.0000000000001301	13	3.25	1.29
MANNOZZI J, 2021, AM J PHYSIOL-REG I	10.1152/ajpregu.00129.2021	13	2.6	0.83
WANG R, 2021, J FOOD BIOCHEM	10.1111/jfbc.13548	13	2.6	0.83
WEI JY, 2020, AM J PHYSIOL-CELL PH	10.1152/ajpcell.00161.2019	13	2.17	0.73
LAGATTA DC, 2018, PFLUG ARCH EUR J PHY	10.1007/s00424-018-2149-5	13	1.63	0.48
SINHAROY P, 2017, PLOS ONE	10.1371/journal.pone.0180106	13	1.44	0.65
HASSAN B, 2014, J NEUROPHYSIOL	10.1152/jn.00630.2014	13	1.08	0.36
GU QH, 2010, AM J PHYSIOL-LUNG C	10.1152/ajplung.00381.2009	13	0.81	0.24
WU C, 2022, BASIC RES CARDIOL	10.1007/s00395-022-00968-x	12	3	1.19
MOCCIA F, 2022, VASC PHARMACOL	10.1016/j.vph.2022.106998	12	3	1.19
ULIANA DL, 2020, J PSYCHOPHARMACOL	10.1177/0269881120928201	12	2	0.67
SKARIA T, 2019, CIRC RES	10.1161/CIRCRESAHA.119.315429	12	1.71	0.96
HUDA R, 2018, J PHYSIOL-LONDON	10.1113/JP275127	12	1.5	0.44
RANDHAWA PK, 2017, N-S ARCH PHARMACOL	10.1007/s00210-016-1311-x	12	1.33	0.6
WANG SF, 2016, MOLECULES	10.3390/molecules21091145	12	1.2	0.49
GRZEDA E, 2015, J PHYSIOL PHARMACOL	NA	12	1.09	0.4
HO WSV, 2013, EUR J PHARMACOL	10.1016/j.ejphar.2013.01.002	12	0.92	0.29
WANG CL, 2024, NAT COMMUN	10.1038/s41467-024-50557-w	11	5.5	3.4
HORI Y, 2021, HEART RHYTHM	10.1016/j.hrthm.2021.04.004	11	2.2	0.7
HERNÁNDEZ-DÍAZ C, 2020, CANNABIS CANNABINOID	10.1089/can.2019.0014	11	1.83	0.61
CHEN K, 2020, J CELL BIOCHEM	10.1002/jcb.29671	11	1.83	0.61
ZHONG BH, 2019, EXP THER MED	10.3892/etm.2019.7987	11	1.57	0.88
MATSUURA K, 2018, TISSUE ENG PART C-ME	10.1089/ten.tec.2018.0228	11	1.38	0.4
GAO XP, 2017, FASEB J	10.1096/fj.201700163R	11	1.22	0.55
SUN T, 2016, INT J CARDIOL	10.1016/j.ijcard.2016.06.092	11	1.1	0.45
TANAKA T, 2011, INT HEART J	10.1536/ihj.52.185	11	0.73	0.17
CASTREJON-TÉLLEZ V, 2022, MOLECULES	10.3390/molecules27031031	10	2.5	0.99
LI QL, 2020, J PHYSIOL-LONDON	10.1113/JP277602	10	1.67	0.56
HORTON JS, 2019, CHANNELS	10.1080/19336950.2018.1547611	10	1.43	0.8
KUROSAKA M, 2016, J CELL PHYSIOL	10.1002/jcp.25345	10	1	0.41
BOROS K, 2016, N-S ARCH PHARMACOL	10.1007/s00210-016-1267-x	10	1	0.41
DING XH, 2007, NEUROSCI LETT	10.1016/j.neulet.2007.07.040	10	0.53	0.2
SU DY, 2022, FRONT PHARMACOL	10.3389/fphar.2022.1081697	9	2.25	0.89
ZALESKI K, 2023, MICROVASC RES	10.1016/j.mvr.2022.104436	9	3	2.21
ZHAO R, 2021, J CELL PHYSIOL	10.1002/jcp.30369	9	1.8	0.58
ROY P, 2021, EUR J HISTOCHEM	10.4081/ejh.2021.3305	9	1.8	0.58
GUO BC, 2020, ENVIRON POLLUT	10.1016/j.envpol.2020.115548	9	1.5	0.5
FERRARIS C, 2020, NUTRIENTS	10.3390/nu12041056	9	1.5	0.5
WANG S, 2020, CHANNELS	10.1080/19336950.2020.1730020	9	1.5	0.5
RANDHAWA PK, 2017, EUR J PHARMACOL	10.1016/j.ejphar.2017.07.045	9	1	0.45
HANSEN EO, 2017, FRONT PHYSIOL	10.3389/fphys.2017.00663	9	1	0.45
REN MM, 2016, CARDIOVASC THER	10.1111/1755-5922.12228	9	0.9	0.37
LAGATTA DC, 2015, BRIT J PHARMACOL	10.1111/bph.13327	9	0.82	0.3
CHU KM, 2010, TOXICOL LETT	10.1016/j.toxlet.2009.11.015	9	0.56	0.17
SHENG J, 2024, CHEM ENG J	10.1016/j.cej.2024.149882	8	4	2.47
BEN SALEM J, 2022, NEUROCHEM RES	10.1007/s11064-021-03471-2	8	2	0.79
CAGLAR TA, 2021, BRAIN RES	10.1016/j.brainres.2020.147201	8	1.6	0.51
LIU BX, 2019, FRONT NEUROANAT	10.3389/fnana.2019.00029	8	1.14	0.64
CHENG XY, 2019, EUR J PHARMACOL	10.1016/j.ejphar.2018.12.007	8	1.14	0.64
RANDHAWA PK, 2017, CARDIOVASC THER	10.1111/1755-5922.12276	8	0.89	0.4
QI Y, 2015, PLOS ONE	10.1371/journal.pone.0133211	8	0.73	0.27
WEDEL J, 2015, TRANSPLANT REV-ORLAN	10.1016/j.trre.2014.12.004	8	0.73	0.27
FOSGERAU K, 2010, BMC CARDIOVASC DISOR-a	10.1186/1471-2261-10-39	8	0.5	0.15
MA ST, 2010, PROG NUTR	NA	8	0.5	0.15
STRECKER T, 2008, NEUROPEPTIDES	10.1016/j.npep.2008.08.002	8	0.44	0.22
YANG C, 2024, INT IMMUNOPHARMACOL	10.1016/j.intimp.2024.112852	7	3.5	2.16
TESSIER N, 2023, CELLS-BASEL	10.3390/cells12182322	7	2.33	1.72
RODIONOVA K, 2020, PFLUG ARCH EUR J PHY	10.1007/s00424-020-02469-z	7	1.17	0.39
BOTONIS PG, 2019, SCAND J MED SCI SPOR	10.1111/sms.13317	7	1	0.56
DE OLIVEIRA JRJM, 2016, PULM PHARMACOL THER	10.1016/j.pupt.2016.09.001	7	0.7	0.28
LIU XH, 2016, AUTON NEUROSCI-BASIC	10.1016/j.autneu.2016.06.001	7	0.7	0.28
ZHAO Y, 2014, PLOS ONE	10.1371/journal.pone.0099704	7	0.58	0.19
WU MY, 2007, AUTON NEUROSCI-BASIC	10.1016/j.autneu.2006.10.007	7	0.37	0.14
GUALTIERI G, 2023, ANTIOXIDANTS-BASEL	10.3390/antiox12051115	6	2	1.48
ULIANA DL, 2023, NEUROPHARMACOLOGY	10.1016/j.neuropharm.2023.109538	6	2	1.48
ISAEV D, 2022, PHARMACEUTICALS-BASE	10.3390/ph15101187	6	1.5	0.6
KANESKI CR, 2022, MOL GENET METAB REP	10.1016/j.ymgmr.2022.100871	6	1.5	0.6
QIN YY, 2022, FRONT PHARMACOL	10.3389/fphar.2022.863322	6	1.5	0.6
FORRESTER EA, 2024, CARDIOVASC RES	10.1093/cvr/cvae156	5	2.5	1.54
LIVIERO F, 2024, FRONT NEUROL	10.3389/fneur.2024.1403551	5	2.5	1.54
MHATRE I, 2023, SCI REP-UK	10.1038/s41598-023-44127-1	5	1.67	1.23
WEI XM, 2023, CHEM BIOL DRUG DES	10.1111/cbdd.14270	5	1.67	1.23
ZALESKI KS, 2023, EUR J APPL PHYSIOL	10.1007/s00421-023-05136-0	5	1.67	1.23
BROWN EF, 2022, MOL CELL ENDOCRINOL	10.1016/j.mce.2022.111764	5	1.25	0.5
SHIBATA R, 2022, CLIN EXP HYPERTENS	10.1080/10641963.2022.2029470	5	1.25	0.5
PERKINSON MR, 2021, INT J MOL SCI	10.3390/ijms22137140	5	1	0.32
DE VILDER EYG, 2021, FRONT CELL DEV BIOL	10.3389/fcell.2021.612581	5	1	0.32
SHARMA SK, 2020, ACS OMEGA	10.1021/acsomega.9b03589	5	0.83	0.28
YU JM, 2019, BIOMED PHARMACOTHER	10.1016/j.biopha.2019.109308	5	0.71	0.4
HU YT, 2019, NEUROGASTROENT MOTIL	10.1111/nmo.13543	5	0.71	0.4
ONCEL CR, 2019, BRATISL MED J	10.4149/BLL_2019_021	5	0.71	0.4
DEÁK É, 2018, NEUROPEPTIDES	10.1016/j.npep.2018.04.003	5	0.63	0.18
ZHANG T, 2017, SHOCK	10.1097/SHK.0000000000000889	5	0.56	0.25
KAWABATA F, 2017, BIOMED RES-TOKYO	NA	5	0.56	0.25
DUTTA A, 2012, PULM PHARMACOL THER	10.1016/j.pupt.2012.07.001	5	0.36	0.11
LIU XH, 2011, EUR J PHARMACOL	10.1016/j.ejphar.2010.10.073	5	0.33	0.08
STRECKER T, 2006, PEPTIDES	10.1016/j.peptides.2006.08.006	5	0.25	0.23
GALIS P, 2023, CARDIOVASC TOXICOL	10.1007/s12012-023-09793-7	4	1.33	0.98
LARSON RA, 2023, AM J PHYSIOL-REG I	10.1152/ajpregu.00102.2022	4	1.33	0.98
SONG CH, 2023, BRATISL MED J	10.4149/BLL_2023_107	4	1.33	0.98
WEN SY, 2022, J DRUG DELIV SCI TEC	10.1016/j.jddst.2022.103229	4	1	0.4
WEN XH, 2021, EVID-BASED COMPL ALT	10.1155/2021/2809004	4	0.8	0.26
VALENCIA-GUZMÁN CJ, 2021, FITOTERAPIA	10.1016/j.fitote.2021.104985	4	0.8	0.26
JIA XL, 2021, MOL BIOL REP	10.1007/s11033-021-06182-7	4	0.8	0.26
OBATA K, 2020, J PHYSIOL SCI	10.1186/s12576-020-00734-5	4	0.67	0.22
ALVES-SANTOS TR, 2019, FRONT PHARMACOL	10.3389/fphar.2019.01407	4	0.57	0.32
TEOFILO TM, 2019, EUR J PHARMACOL	10.1016/j.ejphar.2019.01.063	4	0.57	0.32
HE H, 2018, INT J PHARMACOL	10.3923/ijp.2018.698.706	4	0.5	0.15
BAXTER JC, 2014, J NEUROPHYSIOL	10.1152/jn.00035.2014	4	0.33	0.11
DING MHZ, 2025, BRIT J PHARMACOL	10.1111/bph.17343	3	3	6
JAVAID A, 2024, ARCH BIOCHEM BIOPHYS	10.1016/j.abb.2024.110163	3	1.5	0.93
WANG XM, 2024, EUR J PHARMACOL	10.1016/j.ejphar.2024.176648	3	1.5	0.93
WU C, 2024, BASIC RES CARDIOL	10.1007/s00395-023-01031-z	3	1.5	0.93
TANG RF, 2024, ESC HEART FAIL	10.1002/ehf2.14660	3	1.5	0.93
MA X, 2024, TOXICOL APPL PHARM	10.1016/j.taap.2023.116802	3	1.5	0.93
YANG M, 2024, PLANTA MED	10.1055/a-2176-5881	3	1.5	0.93
JAWAID S, 2022, J ANAT	10.1111/joa.13656	3	0.75	0.3
CÖMERTPAY S, 2022, NUTR CANCER	10.1080/01635581.2021.1980592	3	0.75	0.3
ZHAO L, 2019, FASEB J	10.1096/fj.201900279RR	3	0.43	0.24
OVEY IS, 2019, BRATISL MED J	10.4149/BLL_2019_012	3	0.43	0.24
ZHANG T, 2017, FRONT PHYSIOL	10.3389/fphys.2017.00669	3	0.33	0.15
IDE R, 2012, NEUROSCI LETT	10.1016/j.neulet.2011.11.055	3	0.21	0.07
BORGHI SM, 2024, BRAIN BEHAV IMMUN-HL	10.1016/j.bbih.2024.100897	2	1	0.62
GUO LL, 2024, PHYTOMEDICINE	10.1016/j.phymed.2024.156212	2	1	0.62
ZHANG Y, 2024, CLINICS	10.1016/j.clinsp.2024.100363	2	1	0.62
SONG LL, 2024, FRONT PHARMACOL	10.3389/fphar.2024.1367682	2	1	0.62
MANNOZZI J, 2024, AM J PHYSIOL-REG I	10.1152/ajpregu.00235.2023	2	1	0.62
MOHAMMADIFARD N, 2023, SCI REP-UK	10.1038/s41598-022-23827-0	2	0.67	0.49
PORCARI CY, 2023, NUTRIENTS	10.3390/nu15020254	2	0.67	0.49
TAYLOR D, 2021, CRYOBIOLOGY	10.1016/j.cryobiol.2021.07.013	2	0.4	0.13
SU LDF, 2021, INT J CLIN EXP PATHO	NA	2	0.4	0.13
SZABÓ R, 2020, INT J MOL SCI	10.3390/ijms21228801	2	0.33	0.11
PATRONE LGA, 2019, PHARMACEUTICALS-BASE	10.3390/ph12010019	2	0.29	0.16
ZHONG XP, 2018, THER HYPOTHERMIA TEM	10.1089/ther.2017.0032	2	0.25	0.07
SONG JY, 2017, INT J CLIN EXP MED	NA	2	0.22	0.1
ISSA AT, 2012, NEUROSCI LETT	10.1016/j.neulet.2012.05.006	2	0.14	0.04
JIANG B, 2025, EUR J PHARMACOL	10.1016/j.ejphar.2025.177736	1	1	2
ROCERETA JA, 2025, NAT STRUCT MOL BIOL	10.1038/s41594-025-01494-9	1	1	2
RIVERA-MANCILLA E, 2025, BRIT J PHARMACOL	10.1111/bph.17472	1	1	2
HIDALGO M, 2025, REDOX BIOL	10.1016/j.redox.2025.103507	1	1	2
BLESSING E, 2024, CELLS-BASEL	10.3390/cells13242108	1	0.5	0.31
ZHOU YQ, 2024, METABOLOMICS	10.1007/s11306-024-02112-3	1	0.5	0.31
YAN YF, 2024, HELIYON	10.1016/j.heliyon.2024.e28021	1	0.5	0.31
GUO XJ, 2024, NEUROMODULATION	10.1016/j.neurom.2023.08.010	1	0.5	0.31
WANG J, 2023, LIFE SCI	10.1016/j.lfs.2023.122207	1	0.33	0.25
YAMAGUCHI T, 2023, BIOMEDICINES	10.3390/biomedicines11102720	1	0.33	0.25
ARMSTRONG AW, 2022, J DRUGS DERMATOL	10.36849/JDD.S1188	1	0.25	0.1
KOTODA M, 2022, FRONT PHARMACOL	10.3389/fphar.2022.872477	1	0.25	0.1
VERCELLI C, 2021, VET SCI	10.3390/vetsci8090183	1	0.2	0.06
PALIKOVA YA, 2018, PHARM CHEM J+	10.1007/s11094-018-1865-7	1	0.13	0.04
LV LC, 2025, NEUROMODULATION	10.1016/j.neurom.2024.05.008	0	0	0
LIU P, 2025, FRONT BIOSCI-LANDMRK	10.31083/FBL37052	0	0	0
FIAMINGO M, 2025, ENVIRON SCI TECHNOL	10.1021/acs.est.5c01360	0	0	0
KIM CY, 2025, ANTIOXIDANTS-BASEL	10.3390/antiox14050616	0	0	0
ZHANG Y, 2025, J PHYSIOL PHARMACOL	10.26402/jpp.2025.2.05	0	0	0
MENG TK, 2025, ACTA PHARMACOL SIN	10.1038/s41401-025-01521-x	0	0	0
BELEM IJA, 2025, NEUROPHARMACOLOGY	10.1016/j.neuropharm.2025.110404	0	0	0
WRÓBEL J, 2025, BIOMOLECULES	10.3390/biom15020190	0	0	0
BERTACCHINI GL, 2025, BRIT J PHARMACOL	10.1111/bph.17384	0	0	0
SOARES AG, 2024, BIOMOLECULES	10.3390/biom14010057	0	0	0
REIS TO, 2023, AUTON NEUROSCI-BASIC	10.1016/j.autneu.2023.103073	0	0	0
LI SY, 2022, MEDICINE	10.1097/MD.0000000000029892	0	0	0
BEN SALEM J, 2022, NEUROCHEM RES-a	10.1007/s11064-022-03636-7	0	0	0
JAFFAL SM, 2021, ASIAN PAC J TROP BIO	10.4103/2221-1691.328056	0	0	0
MA ZX, 2021, NEUROREPORT	10.1097/WNR.0000000000001603	0	0	0
DE RINK MMT, 2020, THER HYPOTHERMIA TEM	10.1089/ther.2018.0036	0	0	0
D'YACHENKO IA, 2018, PHARM CHEM J+	10.1007/s11094-018-1793-6	0	0	0
KAUR J, 2018, J PHYSIOL-LONDON	10.1113/JP276971	0	0	0
