# Supplementary material for: TRPV1 deletion in male mice alters cardiomyocyte ultrastructure without affecting baseline cardiac function
Source: Sci Rep. 2025 Dec 21;15:45781. doi: 10.1038/s41598-025-28521-5 (PMC12756331; doi:10.1038/s41598-025-28521-5)
Supplement: Supplementary file 2 — Supplementary Material 2 [file 41598_2025_28521_MOESM2_ESM.xlsx]

## Sheet: Feuil2
id	label	description	url	x	y	cluster	weight<Links>	weight<Total link strength>	weight<Citations>	weight<Norm. citations>	score<Pub. year>	score<Citations>	score<Norm. citations>
5	wang (2005)	trpv1 gene knockout impairs postischemic recovery in isolated perfused heart in mice	https://doi.org/10.1161/circulationaha.105.556274	-0.4851	0.4256	1	48	130	205	2.1134	2005	205	2.1134
14	zhong (2007)	trpv1 gene knockout impairs preconditioning protection against myocardial injury in isolated perfused hearts in mice	https://doi.org/10.1152/ajpheart.00169.2007	-1.0744	0.1872	1	40	146	100	1.982	2007	100	1.982
28	huang (2009)	transient receptor potential vanilloid gene deletion exacerbates inflammation and atypical cardiac remodeling after myocardial infarction	https://doi.org/10.1161/hypertensionaha.108.118349	-0.4777	-0.3179	1	48	146	68	1.452	2009	68	1.452
30	sun (2014)	trpv1 activation exacerbates hypoxia/reoxygenation-induced apoptosis in h9c2 cells via calcium overload and mitochondrial dysfunction	https://doi.org/10.3390/ijms151018362	-0.5727	0.374	1	48	84	65	1.7931	2014	65	1.7931
35	zhong (2008)	n-oleoyldopamine, a novel endogenous capsaicin-like lipid, protects the heart against ischemia-reperfusion injury via activation of trpv1	https://doi.org/10.1152/ajpheart.00022.2008	-1.1417	0.0035	1	42	181	63	1.7234	2008	63	1.7234
36	sexton (2007)	12-lipoxygenase-derived eicosanoids protect against myocardial ischemia/reperfusion injury via activation of neuronal trpv1	https://doi.org/10.1096/fj.06-7828com	-0.4735	0.2811	1	48	127	63	1.2486	2007	63	1.2486
40	andrei (2016)	trpa1 is functionally co-expressed with trpv1 in cardiac muscle: co-localization at z-discs, costameres and intercalated discs	https://doi.org/10.1080/19336950.2016.1185579	-0.6562	-0.1251	1	48	116	57	2.3171	2016	57	2.3171
45	starr (2008)	a reactive oxygen species-mediated component in neurogenic vasodilatation	https://doi.org/10.1093/cvr/cvn012	-0.3591	0.5232	1	48	91	54	1.4772	2008	54	1.4772
49	wei (2009)	decreased expression of transient receptor potential vanilloid 1 impairs the postischemic recovery of diabetic mouse hearts	https://doi.org/10.1253/circj.cj-08-0945	-0.4723	-0.0472	1	48	140	49	1.0463	2009	49	1.0463
50	ren (2011)	cardioprotection by ischemic postconditioning is lost in isolated perfused heart from diabetic rats: involvement of transient receptor potential vanilloid 1, calcitonin gene-related peptide and substance p	https://doi.org/10.1016/j.regpep.2011.04.004	-0.7183	-0.592	1	41	94	48	0.7539	2011	48	0.7539
56	zhong (2009)	protease-activated receptor 2-mediated protection of myocardial ischemia-reperfusion injury: role of transient receptor potential vanilloid receptors	https://doi.org/10.1152/ajpregu.90746.2008	-1.4405	-0.1125	1	30	96	44	0.9395	2009	44	0.9395
58	lu (2014)	hypoxic preconditioning protects rat hearts against ischemia-reperfusion injury via the arachidonate12-lipoxygenase/transient receptor potential vanilloid 1 pathway	https://doi.org/10.1007/s00395-014-0414-0	-1.1658	-0.3731	1	35	98	42	1.1586	2014	42	1.1586
71	bencsik (2008)	cardiac capsaicin-sensitive sensory nerves regulate myocardial relaxation via s-nitrosylation of serca:: role of peroxynitrite	https://doi.org/10.1038/sj.bjp.0707599	-1.0757	-0.2266	1	32	64	35	0.9574	2008	35	0.9574
75	lu (2013)	cold stress accentuates. pressure overload-induced cardiac hypertrophy and contractile dysfunction: role of trpv1/ampk-mediated autophagy	https://doi.org/10.1016/j.bbrc.2013.10.128	-0.1213	-0.2328	1	48	92	34	0.8076	2013	34	0.8076
76	horton (2013)	successful trpv1 antagonist treatment for cardiac hypertrophy and heart failure in mice	https://doi.org/10.4161/chan.23006	-1.109	-0.4486	1	30	64	34	0.8076	2013	34	0.8076
91	sakamoto (2014)	activation of the trpv1 channel attenuates n-methyl-d-aspartic acid-induced neuronal injury in the rat retina	https://doi.org/10.1016/j.ejphar.2014.03.035	-0.2678	0.3596	1	48	73	30	0.8276	2014	30	0.8276
99	zhong (2018)	genetic ablation of trpv1 exacerbates pressure overload-induced cardiac hypertrophy	https://doi.org/10.1016/j.biopha.2018.01.065	-0.7053	0.145	1	48	133	27	0.9939	2018	27	0.9939
101	huang (2010)	enhanced postmyocardial infarction fibrosis via stimulation of the transforming growth factor-β-smad2 signaling pathway: role of transient receptor potential vanilloid type 1 channels	https://doi.org/10.1097/hjh.0b013e328333af48	-0.8491	-0.3501	1	39	104	27	0.5044	2010	27	0.5044
115	steagall (2012)	substance p release in response to cardiac ischemia from rat thoracic spinal dorsal horn is mediated by trpv1	https://doi.org/10.1016/j.neuroscience.2012.04.023	-0.1058	-0.3814	1	49	138	22	0.4809	2012	22	0.4809
113	xu (2020)	inhibition of drg-trpv1 upregulation in myocardial ischemia contributes to exogenous cardioprotection	https://doi.org/10.1016/j.yjmcc.2019.12.003	-0.5885	-0.2313	1	48	99	22	1.2284	2020	22	1.2284
117	chen (2018)	endogenously generated arachidonate-derived ligands for trpv1 induce cardiac protection in sepsis	https://doi.org/10.1096/fj.201701303r	-0.3616	0.136	1	49	144	21	0.773	2018	21	0.773
1	yang (2010)	activation of trpv1 by dietary capsaicin improves endothelium-dependent vasorelaxation and prevents hypertension	https://doi.org/10.1016/j.cmet.2010.05.015	0.2739	0.7396	2	44	87	281	5.2495	2010	281	5.2495
8	cheng (2007)	thermosensitive trpv channel subunits coassemble into heteromeric channels with intermediate conductance and gating properties	https://doi.org/10.1085/jgp.200709731	0.6443	0.3283	2	44	78	155	3.0721	2007	155	3.0721
10	luo (2012)	trpv1 activation improves exercise endurance and energy metabolism through pgc-1α upregulation in mice	https://doi.org/10.1038/cr.2011.205	0.6289	0.6251	2	40	55	151	3.3005	2012	151	3.3005
19	marshall (2013)	a role for trpv1 in influencing the onset of cardiovascular disease in obesity	https://doi.org/10.1161/hypertensionaha.112.201434	-0.0484	0.5805	2	48	103	81	1.924	2013	81	1.924
27	lang (2015)	activation of trpv1 attenuates high salt-induced cardiac hypertrophy through improvement of mitochondrial function	https://doi.org/10.1111/bph.12987	0.6083	0.5584	2	40	54	69	2.3086	2015	69	2.3086
29	gao (2014)	trpv1 activation attenuates high-salt diet-induced cardiac hypertrophy and fibrosis through ppar-δ upregulation	https://doi.org/10.1155/2014/491963	0.4607	0.6041	2	43	69	66	1.8207	2014	66	1.8207
38	yoshie (2020)	cardiac trpv1 afferent signaling promotes arrhythmogenic ventricular remodeling after myocardial infarction	https://doi.org/10.1172/jci.insight.124477	0.2991	-0.177	2	45	60	60	3.3503	2020	60	3.3503
48	buckley (2011)	mice lacking functional trpv1 are protected from pressure overload cardiac hypertrophy	https://doi.org/10.4161/chan.5.4.17083	-0.2285	0.0278	2	48	96	49	0.7696	2011	49	0.7696
47	sun (2012)	anti-nociceptive effects of tanshinone iia (tiia) in a rat model of complete freund's adjuvant (cfa)-induced inflammatory pain	https://doi.org/10.1016/j.brainresbull.2012.06.002	0.3283	0.4809	2	43	68	49	1.071	2012	49	1.071
51	phan (2020)	trpv1 expressed throughout the arterial circulation regulates vasoconstriction and blood pressure	https://doi.org/10.1113/jp279909	0.1458	0.1491	2	49	165	47	2.6244	2020	47	2.6244
54	guarini (2012)	disruption of trpv1-mediated coupling of coronary blood flow to cardiac metabolism in diabetic mice: role of nitric oxide and bk channels	https://doi.org/10.1152/ajpheart.00011.2012	0.2409	0.5779	2	46	76	47	1.0273	2012	47	1.0273
57	hurt (2016)	transient receptor potential vanilloid 1 regulates mitochondrial membrane potential and myocardial reperfusion injury	https://doi.org/10.1161/jaha.116.003774	-0.0618	-0.0122	2	47	74	42	1.7073	2016	42	1.7073
61	gu (2005)	2-aminoethoxydiphenyl borate stimulates pulmonary c neurons via the activation of trpv channels	https://doi.org/10.1152/ajplung.00439.2004	0.721	0.1192	2	46	90	40	0.4124	2005	40	0.4124
67	strecker (2005)	role of different proton-sensitive channels in releasing calcitonin gene-related peptide from isolated hearts of mutant mice	https://doi.org/10.1016/j.cardiores.2004.10.013	0.4603	0.2793	2	46	88	37	0.3814	2005	37	0.3814
68	fosgerau (2010)	drug-induced mild therapeutic hypothermia obtained by administration of a transient receptor potential vanilloid type 1 agonist	https://doi.org/10.1186/1471-2261-10-51	0.5078	0.1171	2	42	57	36	0.6725	2010	36	0.6725
72	movahed (2005)	vascular effects of anandamide and n-acylvanillylamines in the human forearm and skin microcirculation	https://doi.org/10.1038/sj.bjp.0706313	0.1433	0.4717	2	44	65	35	0.3608	2005	35	0.3608
74	terzian (2014)	medial prefrontal cortex transient receptor potential vanilloid type 1 (trpv1) in the expression of contextual fear conditioning in wistar rats	https://doi.org/10.1007/s00213-013-3211-9	0.4435	-0.0416	2	42	59	34	0.9379	2014	34	0.9379
78	ma (2014)	nicotinic acid activates the capsaicin receptor trpv1 potential mechanism for cutaneous flushing	https://doi.org/10.1161/atvbaha.113.303346	0.7167	0.0233	2	42	64	33	0.9103	2014	33	0.9103
102	drizin (2006)	structure-activity studies of a novel series of 5,6-fused heteroaromatic ureas as trpv1 antagonists	https://doi.org/10.1016/j.bmc.2006.03.027	0.3834	0.0804	2	47	97	27	1.2162	2006	27	1.2162
22	smith (2005)	the capsaicin-sensitive afferent neuron in skeletal muscle is abnormal in heart failure	https://doi.org/10.1161/01.cir.0000162473.10951.0a	1.2829	-0.7164	3	19	50	79	0.8144	2005	79	0.8144
39	sun (2009)	sensing of blood pressure increase by transient receptor potential vanilloid 1 receptors on baroreceptors	https://doi.org/10.1124/jpet.109.160473	0.2791	-0.4961	3	48	88	58	1.2384	2009	58	1.2384
43	mizuno (2011)	antagonism of the trpv1 receptor partially corrects muscle metaboreflex overactivity in spontaneously hypertensive rats<	https://doi.org/10.1113/jphysiol.2011.214429	0.9985	-0.3804	3	47	99	55	0.8639	2011	55	0.8639
70	xing (2008)	femoral artery occlusion augments trpv1-mediated sympathetic responsiveness	https://doi.org/10.1152/ajpheart.00271.2008	1.0611	-0.6011	3	46	104	35	0.9574	2008	35	0.9574
81	vianna (2018)	capsaicin-based analgesic balm attenuates the skeletal muscle metaboreflex in healthy humans	https://doi.org/10.1152/japplphysiol.00038.2018	0.8427	-0.1007	3	43	61	32	1.1779	2018	32	1.1779
88	xing (2009)	contribution of nerve growth factor to augmented trpv1 responses of muscle sensory neurons by femoral artery occlusion	https://doi.org/10.1152/ajpheart.00063.2009	0.8489	-0.589	3	47	102	31	0.6619	2009	31	0.6619
97	gao (2007)	effect of muscle interstitial ph on p2x and trpv1 receptor-mediated pressor response	https://doi.org/10.1152/japplphysiol.00161.2007	1.1433	-0.3858	3	43	86	28	0.555	2007	28	0.555
120	mu (2007)	role of trpv1 and intracellular ca<sup>2+</sup> in excitation of cardiac sensory neurons by bradykinin	https://doi.org/10.1152/ajpregu.00094.2007	0.0715	-0.5835	3	48	115	21	0.4162	2007	21	0.4162
126	akabori (2007)	transient receptor potential vainilloid 1 antagonist, capsazepine, improves survival in a rat hemorrhagic shock model	https://doi.org/10.1097/01.sla.0000255577.80800.e1	0.0395	-0.479	3	49	114	20	0.3964	2007	20	0.3964
122	ishizawa (2021)	trpv1 (transient receptor potential vanilloid 1) sensitization of skeletal muscle afferents in type 2 diabetic rats with hyperglycemia	https://doi.org/10.1161/hypertensionaha.120.15672	0.9863	-0.1961	3	43	82	20	1.2791	2021	20	1.2791
